# Supplementary material for: Preparation and lithium storage of core–shell honeycomb-like Co3O4@C microspheres
Source: Royal Society of Chemistry journal article supplement (doi:10.1039/d2ra05204k), 2022-01-01
Supplement: d2ra05204k1.pdf [file d2ra05204k1.pdf]

## Supporting Information

### Preparation and Lithium Storage of Core-Shell Honeycomb-Like $\text{Co}_3\text{O}_4$ @C Microspheres

Linhe Yu<sup>1</sup>, Qihao Yang<sup>1</sup>, Guozhen Zhu<sup>1\*</sup>, Renchao Che<sup>2,3\*</sup>

1. Institute of Advanced Materials, Jiangxi Normal University, Nanchang 330022, P. R. China

2. Laboratory of Advanced Materials, Shanghai Key Lab of Molecular Catalysis and Innovative Materials, Fudan University, Shanghai 200438, PR China

3. Department of Materials Science, Fudan University, Shanghai 200438, PR China

**Keywords:** Anode material,  $\text{Co}_3\text{O}_4$ , core-shell, honeycomb, lithium storage.

E-mail: zhuguozhen@jxnu.edu.cn, rcche@fudan.edu.cn

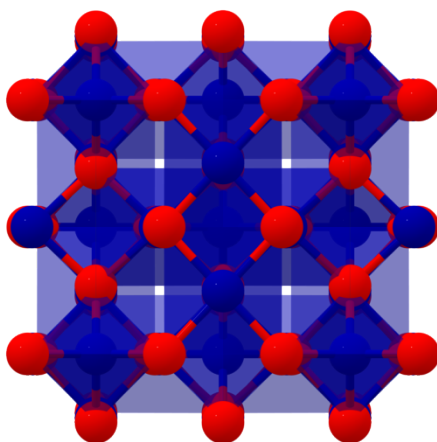

Figure S1. crystal structure of  $\text{Co}_3\text{O}_4$

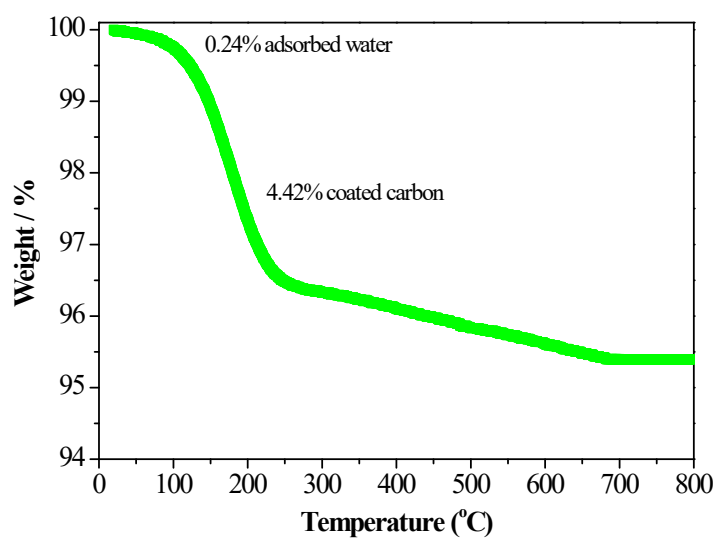

Figure S2. Thermogravimetric curve of CSHCo<sub>3</sub>O<sub>4</sub>@C microspheres

Figure S3. (a-c) SEM images, (d) HRTEM image of CSHCo<sub>3</sub>O<sub>4</sub>@C microspheres

Figure S4. (a) SEM image of CSHCo<sub>3</sub>O<sub>4</sub>@C microsphere, EDX mapping of (b) Co, (c) O, (d) C

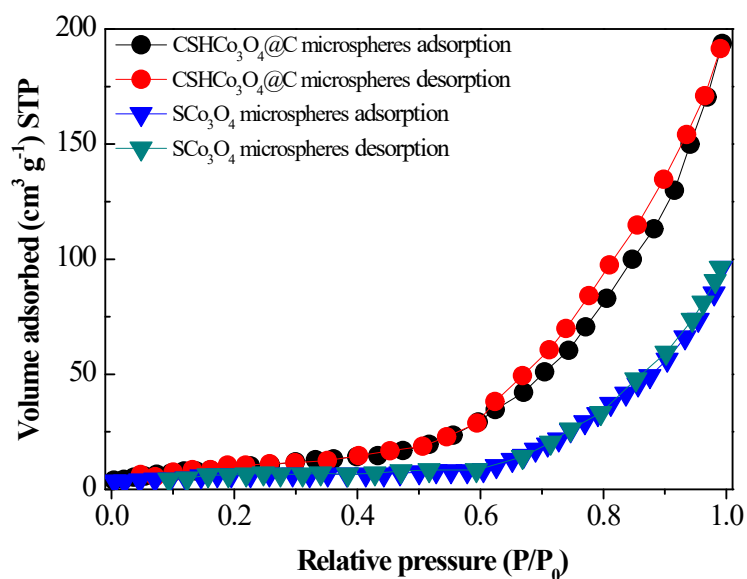

Figure S5. N<sub>2</sub> adsorption/desorption curves of CSHCo<sub>3</sub>O<sub>4</sub>@C and

## SCo<sub>3</sub>O<sub>4</sub> microspheres

Figure S6. Charge and discharge curves of (a) CSHCo<sub>3</sub>O<sub>4</sub>@C, (b) FCo<sub>3</sub>O<sub>4</sub>, and (c) SCo<sub>3</sub>O<sub>4</sub> microspheres

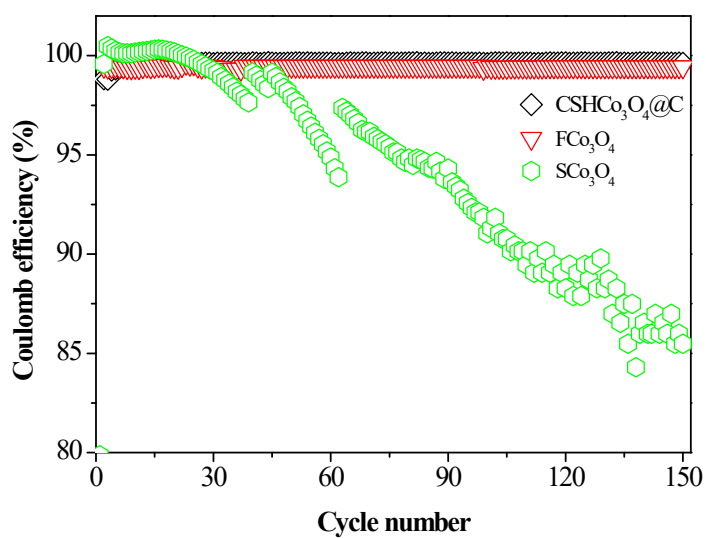

Figure S7. The coulombic efficiency of CSHCo<sub>3</sub>O<sub>4</sub>@C, SCo<sub>3</sub>O<sub>4</sub>, and FCo<sub>3</sub>O<sub>4</sub> microspheres at 0.2 C for 150 cycles

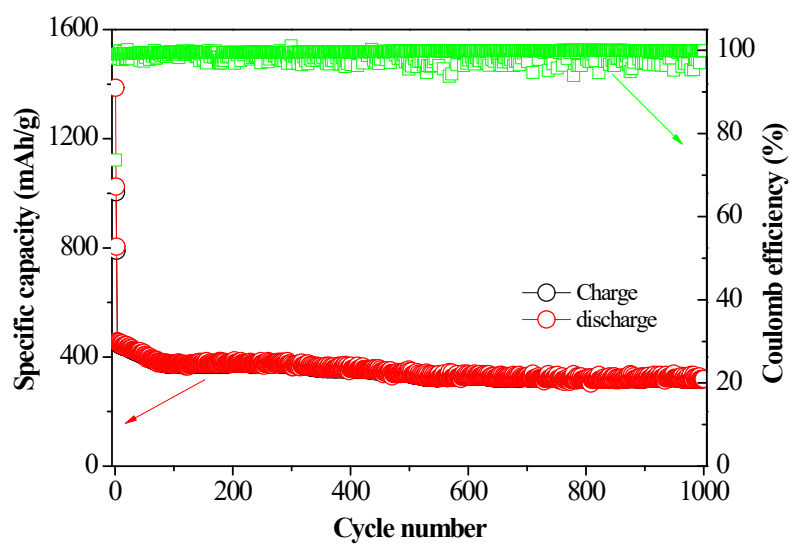

Figure S8. Cycling performance of CSHCo<sub>3</sub>O<sub>4</sub>@C microspheres at 5 C after 1000 cycles

Figure S9.  $\sigma$  values of CSHCo<sub>3</sub>O<sub>4</sub>@C, SCo<sub>3</sub>O<sub>4</sub>, and FCo<sub>3</sub>O<sub>4</sub> microspheres

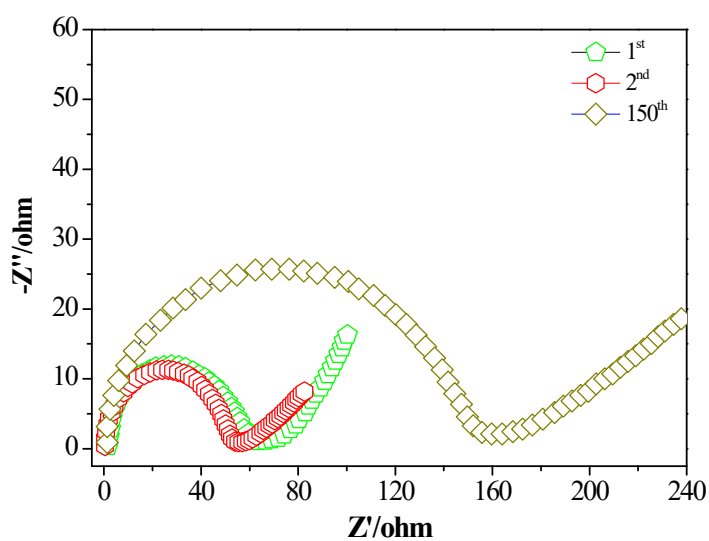

Figure S10. The 1<sup>st</sup>, 2<sup>nd</sup>, and 150<sup>th</sup> electrochemical impedance spectroscopy of CSHCo<sub>3</sub>O<sub>4</sub>@C microspheres

Table S1. The rate capability comparison of the reported cobalt oxide materials and CSHCo<sub>3</sub>O<sub>4</sub>@C microspheres

| Materials                                             | Specific capacity<br>(mA h g <sup>-1</sup> ) | Current density<br>(mA g <sup>-1</sup> ) | Reference        |
|-------------------------------------------------------|----------------------------------------------|------------------------------------------|------------------|
| CoO@N-C nanocubes                                     | 309                                          | 1000                                     | [1]              |
| G-Co <sub>3</sub> O <sub>4</sub> rose-spheres         | 462.3                                        | 4450                                     | [2]              |
| CNFs/Co <sub>3</sub> O <sub>4</sub>                   | 867                                          | 2000                                     | [3]              |
| 3D hierarchical porous Co <sub>3</sub> O <sub>4</sub> | 987                                          | 1200                                     | [4]              |
| <b>CSHCo<sub>3</sub>O<sub>4</sub>@C</b>               | <b>318.9</b>                                 | <b>8900</b>                              | <b>This work</b> |

Table S2. Electrochemical performance comparison of the reported cobalt oxide materials with different structure and CSHCo<sub>3</sub>O<sub>4</sub>@C microspheres

| Materials                                        | Specific capacity<br>(mA h g <sup>-1</sup> ) | Current density<br>(mA g <sup>-1</sup> ) | Cycles     | Reference        |
|--------------------------------------------------|----------------------------------------------|------------------------------------------|------------|------------------|
| Co <sub>3</sub> O <sub>4</sub> hexapods          | 166                                          | 90                                       | 100        | [5]              |
| CoO nanoparticles                                | 458                                          | 200                                      | 80         | [6]              |
| Pristine CoO nanorods                            | 259                                          | 71.6                                     | 50         | [7]              |
| Co <sub>3</sub> O <sub>4</sub> /carbon nanowires | 534                                          | 100                                      | 20         | [8]              |
| <b>CSHCo<sub>3</sub>O<sub>4</sub>@C</b>          | <b>1091.2</b>                                | <b>178</b>                               | <b>150</b> | <b>This work</b> |

Table S3. The resistance values of CSHCo<sub>3</sub>O<sub>4</sub>@C, FCo<sub>3</sub>O<sub>4</sub>, SCo<sub>3</sub>O<sub>4</sub> microspheres after fitting of EIS data

| Materials                            | R <sub>s</sub><br>(ohm/cm <sup>2</sup> ) | Q <sub>1</sub> (μF/cm <sup>2</sup> ) | R <sub>ct</sub><br>(ohm/cm <sup>2</sup> ) | Q <sub>2</sub> (μF/cm <sup>2</sup> ) |
|--------------------------------------|------------------------------------------|--------------------------------------|-------------------------------------------|--------------------------------------|
| CSHCo <sub>3</sub> O <sub>4</sub> @C | 1.38                                     | 1.86                                 | 82.15                                     | 2534.18                              |
| FCo <sub>3</sub> O <sub>4</sub>      | 1.09                                     | 1.57                                 | 112.36                                    | 5867.39                              |
| SCo <sub>3</sub> O <sub>4</sub>      | 1.21                                     | 1.73                                 | 135.78                                    | 1037.47                              |

Table S4. The resistance values of CSHCo<sub>3</sub>O<sub>4</sub>@C microspheres during cycling

| CSHCo <sub>3</sub> O <sub>4</sub> @C | R <sub>s</sub><br>(ohm/cm <sup>2</sup> ) | Q <sub>1</sub> (μF/cm <sup>2</sup> ) | R <sub>ct</sub> (ohm/cm <sup>2</sup> ) | Q <sub>2</sub> (μF/cm <sup>2</sup> ) |
|--------------------------------------|------------------------------------------|--------------------------------------|----------------------------------------|--------------------------------------|
| 1 <sup>st</sup>                      | 3.57                                     | 0.76                                 | 63.37                                  | 3123.56                              |
| 2 <sup>nd</sup>                      | 2.83                                     | 0.37                                 | 53.85                                  | 3908.51                              |
| 150 <sup>th</sup>                    | 1.69                                     | 1.35                                 | 157.63                                 | 7325.56                              |

## References

- [1] K. W. Xie, P. Wu, Y. Y. Zhou, et al. Nitrogen-Doped Carbon-Wrapped Porous Single-Crystalline CoO Nanocubes for High-Performance Lithium Storage. *ACS Applied Materials & Interfaces*, 2014, 6, 13, 10602-10607.
- [2] M. J. Jing, M. J. Zhou, G. Y. Li, et al. Graphene-Embedded Co<sub>3</sub>O<sub>4</sub> Rose-Spheres for Enhanced Performance in Lithium Ion Batteries. *Applied Materials & Interfaces*, 2017, 9, 11, 9662-9668.
- [3] H. Wang, Y. W. Li, M. W. Wang, et al. Rationally Designed Hierarchical Porous CNFs/Co<sub>3</sub>O<sub>4</sub> Nanofibers-Based Anode for Realizing High Lithium Ion Storage. *RSC Advances*, 2018, 8, 54: 30794-30801.
- [4] X. G. Han, X. Han, W. W. Zhan, et al. Preparation of 3D Hierarchical Porous Co<sub>3</sub>O<sub>4</sub> Nanostructures with Enhanced Performance in Lithium-Ion Batteries. *RSC Advances*, 2018, 8, 6: 3218-3224.

- [5] Rui X, Tan H, Sim D, et al. Template-Free Synthesis of Urchin-Like  $\text{Co}_3\text{O}_4$  Hollow Spheres with Good Lithium Storage Properties[J]. Journal of Power Sources, 2013, 222: 97-102.
- [6] Zhang M, Wang Y, Jia M. Three-Dimensional Reduced Graphene Oxides Hydrogel Anchored with Ultrafine CoO Nanoparticles as Anode for Lithium Ion Batteries[J]. Electrochimica Acta, 2014, 129: 425-432.
- [7] Wu F D, Wang Y. Self-Assembled Echinus-Like Nanostructures of Mesoporous CoO Nanorod@CNT for Lithium-Ion Batteries[J]. Journal of Materials Chemistry, 2011, 21: 6636-6641.
- [8] Zhang P, Guo Z P, Huang Y, et al. Synthesis of  $\text{Co}_3\text{O}_4$ /Carbon Composite Nanowires and Their Electrochemical Properties[J]. Journal of Power Sources, 2011, 196: 6987-6991.
